# Supplementary material for: Bifidobacterium longum relieves constipation by regulating the intestinal barrier of mice
Source: Royal Society of Chemistry journal article supplement (doi:10.1039/d1fo04151g), 2022-01-01
Supplement: d1fo04151g1.pdf [file d1fo04151g1.pdf]

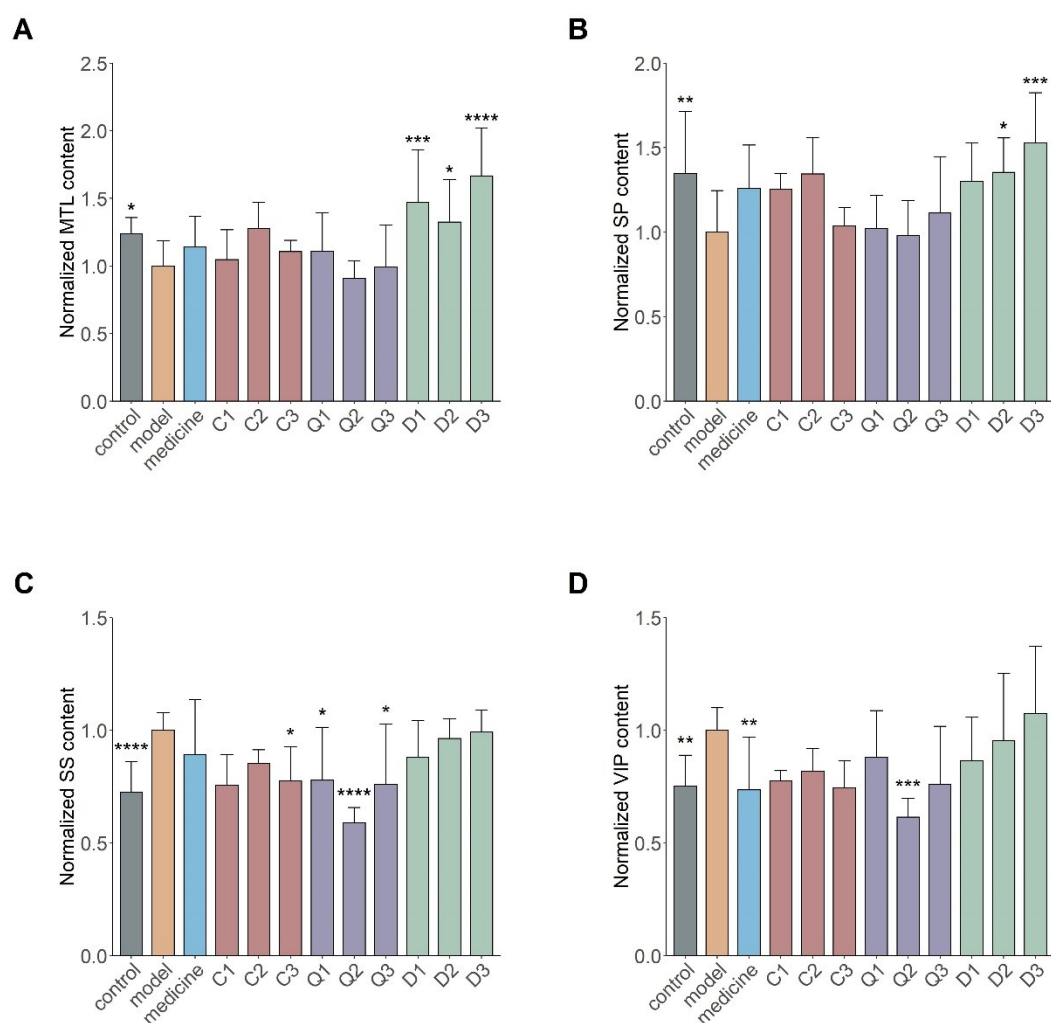

**Figure S1. The levels of gastrointestinal regulatory peptides in serum of mice. A, MTL; B, SP; C, SS; D, VIP**

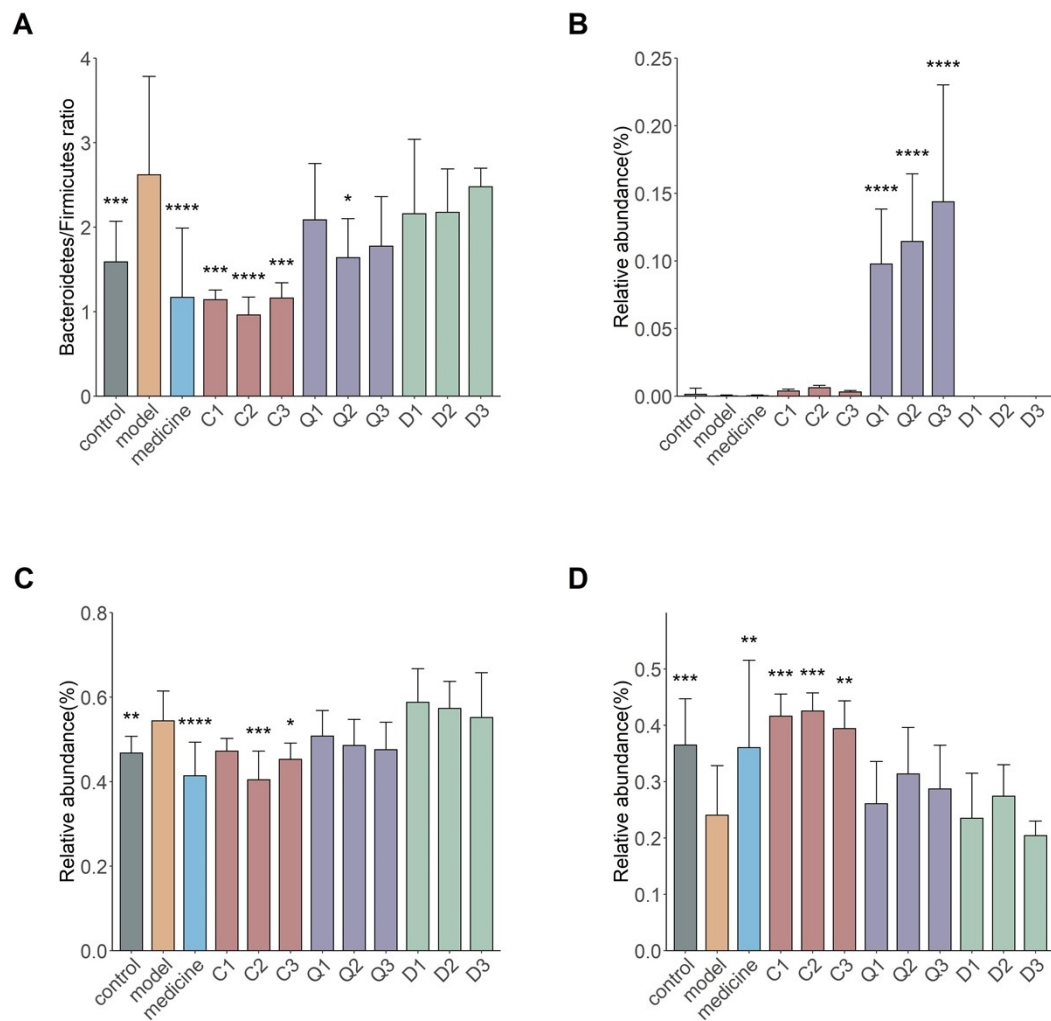

**Figure S2. The intestinal microbiota at the phylum level.** A, the ratio of Bacteroidetes/Firmicutes; B, The relative abundance of Actinobacteria; C, The relative abundance of Bacteroidetes; D, The relative abundance of Firmicutes.
